RESEARCH ARTICLE

# Use of dietary and performance-enhancing supplements among male fitness center members in Riyadh: A cross-sectional study

Yazed AlRuthia<sup>1,2\*</sup>, Bander Balkhi<sup>1,2</sup>, Marwan Alrasheed<sup>1</sup>, Ahmed Altuwaijri<sup>3</sup>, Mohammad Alarifi<sup>1</sup>, Huda Alzahrani<sup>4</sup>, Wael Mansy<sup>1</sup>

**1** Department of Clinical Pharmacy, College of Pharmacy, King Saud University, Riyadh, Saudi Arabia, **2** Pharmacoeconomics Research Unit, College of Pharmacy, King Saud University, Riyadh, Saudi Arabia, **3** Department of Pharmacology and Toxicology, College of Pharmacy, King Saud University, Riyadh, Saudi Arabia, **4** Department of Pharmacy, King Khalid University Hospital, Riyadh, Saudi Arabia

\* [yazeed@ksu.edu.sa](mailto:yazeed@ksu.edu.sa)

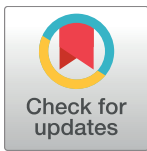

**OPEN ACCESS**

**Citation:** AlRuthia Y, Balkhi B, Alrasheed M, Altuwaijri A, Alarifi M, Alzahrani H, et al. (2018) Use of dietary and performance-enhancing supplements among male fitness center members in Riyadh: A cross-sectional study. PLoS ONE 13 (6): e0199289. <https://doi.org/10.1371/journal.pone.0199289>

**Editor:** Lynn Cialdella-Kam, Case Western Reserve University School of Medicine, UNITED STATES

**Received:** April 1, 2017

**Accepted:** June 5, 2018

**Published:** June 21, 2018

**Copyright:** © 2018 AlRuthia et al. This is an open access article distributed under the terms of the [Creative Commons Attribution License](https://creativecommons.org/licenses/by/4.0/), which permits unrestricted use, distribution, and reproduction in any medium, provided the original author and source are credited.

**Data Availability Statement:** All relevant data are within the paper and its Supporting Information files.

**Funding:** The authors acknowledge financial support from the College of Pharmacy Research Center and the Deanship of Scientific Research, King Saud University (Riyadh, Saudi Arabia). The funders had no role in study design, data collection and analysis, decision to publish, or preparation of the manuscript.

## Abstract

This study aimed to explore the health beliefs and patterns of dietary supplement usage among fitness center members. This cross-sectional study was conducted in four large indoor fitness centers in Riyadh, Saudi Arabia. This study involved male fitness center members aged  $\geq 18$  years with no speech or hearing disabilities. In-person interviews were conducted with fitness center members who agreed to participate using a newly developed questionnaire. Information on participants' sociodemographics (e.g., age and education), smoking status, health status, exercise frequency, average time spent exercising, different supplements used, used supplements sources, and health beliefs regarding dietary supplements were obtained. A total of 445 fitness center members agreed to participate, and 198 of them reported taking dietary supplements. Most participants were between the age of 18 and 25 years (66%), had a college degree (74%), non-smokers (77%), healthy (84%), and perform exercise at least thrice weekly (52%) for at least 1 hour (63%). The percentage of participants who had favorable health views on dietary supplements was significantly higher among the supplement users than among the non-users ( $P < 0.0001$ ). Proteins, multivitamins, amino acids, and omega 3 fatty acids were the most commonly reported supplements used. Almost 30% of the supplement users reported buying them overseas, 28% online, 25% from a pharmacy or supplement store, 19% from a medical clinic, and 17% from peddlers. Public health campaigns are needed to educate the public on the potential harmful effects of supplements if purchased from an unofficial seller or taken without seeking medical advice before using them.

## Introduction

The demand for dietary supplements in the United States (US) has increased over the past 2 decades as people are becoming more health-conscious [1, 2]. The same upward trend in dietary supplements consumption was also noticed in the Middle East, especially among athletes

**Competing interests:** The authors have declared that no competing interests exist.

[3–6]. According to the US Dietary Supplement Health and Education Act of 1994, which has amended the US Federal Food, Drug, and Cosmetic Act of 1938, dietary supplement is defined as any “product that contains dietary ingredient with purported additional nutritional value (e.g., supplement) to an individual’s daily diet” [7]. Although dietary supplements include products with proven nutritional values, such as multivitamins and minerals, many medicinal products with unproven nutritional or medicinal values are classified as dietary supplements, such as herbs and sexual performance-enhancing supplements [8]. Today, many students and athletes in Saudi Arabia and the Middle East who consume dietary supplements have positive views on supplements in terms of their efficacy in improving their health and performance as well as their safety [3, 6]. This may arise from the widely spread belief that minerals, vitamins, and even herbal products are natural and harmless, which might not be the case all the time [8]. For example, abrupt withdrawal of high-dose vitamin D supplements may lead to a deficiency in the bioactive form of vitamin D, resulting in osteomalacia and muscle weakness [9]. Moreover, use of iron supplements for some individuals with no iron-deficiency anemia and certain genetic predisposition may lead to hemochromatosis and organ toxicity [10]. Therefore, taking dietary supplements is not appropriate for all individuals and these supplements should not be provided indiscriminately.

Moreover, the manufacturers of these supplements in the Saudi Arabia as well as in the US are only required by the Saudi Food and Drug Authority (SFDA) and the US Food and Drug Administration (USFDA), respectively, to adhere to the good manufacturing practices for dietary supplements to ensure that their products are safe, clean, and wholesome [11,12]. However, they are not required to provide any documentations, such as data from randomized clinical trials that prove the efficacy of their products as they claim [11, 12].

Conversely, many dietary supplements have been recalled from the market for being contaminated with prescription drugs and/or microorganisms [8, 12– 14]. Although the SFDA requires the manufacturers of dietary supplements to provide evidence that proves the safety and purity of their preparations besides examining a sample of the new products in the SFDA laboratories, some products were found to be contaminated with microorganisms after being approved and marketed [15]. For example, some weight loss products were found to be contaminated with aliphatic amine stimulants, such as 1,3-dimethylamylamine, which has been implicated with several cases of cerebral hemorrhage and cardiac arrest [16–19]. Moreover, some dietary products with performance-enhancing claims have been recalled from the US market after being contaminated with amphetamine analogs or sexual performance-enhancing prescription drugs, such as sildenafil [20, 21]. What is more concerning is that many athletes and fitness center members who consume dietary supplements are not aware of such dangers, especially if they buy such products from unlicensed sellers [4, 6, 13].

This study aimed to explore the pattern of use of dietary and herbal supplements as well as compare the perceptions and beliefs between users and non-users of these supplements among fitness center members in Riyadh, Saudi Arabia. In addition, the study aimed to explore the sources from where fitness center members buy these supplements.

## Materials and methods

### Study design

This cross-sectional, descriptive study was conducted in four large fitness centers in the city of Riyadh, Saudi Arabia. Male fitness center members, those aged  $\geq 18$  years, and those without speech or hearing disabilities were included in the study. Women were excluded owing to the cultural and religious restrictions in Saudi Arabia.

## Ethical consideration

The study was approved by the ethics committee of the College of Pharmacy at King Saud University. The legal approval to collect the data from the fitness centers was sought and obtained from Leejam Sports Company, which is the owner of the four large fitness centers that were surveyed. The collected data were kept in a safe and secure place according to the principles expressed in the Declaration of Helsinki.

## Sample size estimation

The minimum sample size was calculated using the Fisher's exact test for inequality between two proportions (users vs. non-users of dietary supplements), with regard to their positive or negative beliefs on dietary supplements, at an alpha of 0.05, beta of 0.2, and medium effect size of 0.2 (e.g., 20% difference in the proportion between the two groups) [4]. The GPower<sup>®</sup> 3.1 software was used to perform the power analysis [22].

## Study questionnaire

To explore the pattern of use of and beliefs regarding dietary supplements among fitness center members, a new questionnaire was developed by 4 members of the research team, who had previous experience in questionnaire development and validation, on the basis of the covered items of previously used and published questionnaires [1, 4, 23, 24]. The questionnaire consisted of 14 questions on the participants' sociodemographics (e.g., age and education); chronic health conditions; regular medical checkups; frequency of exercise; average time spent on exercise daily; used dietary or performance-enhancing supplements, if any; and beliefs regarding dietary supplements (e.g., side effects, effect on exercise and health). Answers to these questions were recorded as "yes," "no," and "do not know." Once the questionnaire was developed, it was sent to 3 external reviewers. The reviewers were a physician (general practitioner) who usually sees athletes for a yearly checkup, a clinical pharmacist who is active in patient counseling and education, and a researcher in social and behavioral sciences. In order to check the face validity, the reviewers were asked to rate the clarity of the questionnaire's wording in an electronic form that rates each item of the questionnaire in a 4-point Likert scale (1 = unclear, 2 = somewhat clear, 3 = clear, 4 = very clear). Further, to check the content validity the reviewers were asked to provide their comments and suggestions regarding the relevance of the questionnaire to the beliefs about dietary supplements and to the study aims in a separate sheet that included each item of the questionnaire and a blank space next to it. The questionnaire was then revised based on the reviewers' comments, and was sent back to them for further review. The revised version of the questionnaire was approved by all reviewers.

## Data collection

The eligible participants were asked to sign a consent form to ensure that they understood the purpose of this research as well as to assure them of the confidentiality and anonymity of any personal information before being interviewed for 10–15 min. Two pharmacy interns were involved in the data collection. The data collection started in January 2015 and ended in August 2015.

## Statistical analysis

Descriptive statistics were conducted using the chi-square test and Fisher's exact test as appropriate to compare the proportion of the participants with favorable and unfavorable beliefs regarding dietary supplements between the two groups (users vs. non-users of dietary

supplements). The significance level was specified at  $\alpha = 0.05$ . All statistical analyses were performed using SAS version 9.2 (SAS Institute, Inc., Cary, NC, USA).

## Results

Table 1 presents the sociodemographic, medical, and lifestyle characteristics of the 198 participants who reported taking dietary supplements and 247 participants who denied taking any dietary supplements. Most of the participants were aged between 18 and 40 years, with no chronic health conditions, and had a relatively high level of education (e.g., an associate degree or above). Further, more than 75% of the participants were non-smokers with comparable

**Table 1. Sociodemographic, medical, and lifestyle characteristics of the participants.**

| Characteristics                                        | Supplement users N = 198 (%) | Non-supplement users N = 247 (%) | Total population N = 445 (%) |
|--------------------------------------------------------|------------------------------|----------------------------------|------------------------------|
| <b>Age (y)</b>                                         |                              |                                  |                              |
| 18–25                                                  | 62.1                         | 70.4                             | 66.7                         |
| 26–40                                                  | 30.8                         | 23.9                             | 27                           |
| 41–60                                                  | 6.6                          | 5.3                              | 5.9                          |
| > 60                                                   | 1.1                          | 0                                | 0.5                          |
| <b>Education</b>                                       |                              |                                  |                              |
| Less than high school                                  | 0.5                          | 0                                | 0.5                          |
| High school                                            | 12.1                         | 20.0                             | 16.5                         |
| College degree (e.g., associate or baccalaureate)      | 79.8                         | 71                               | 74.9                         |
| Graduate degree (e.g., master or PhD)                  | 7.6                          | 8.9                              | 8.1                          |
| <b>Smoking status</b>                                  |                              |                                  |                              |
| Smoker                                                 | 24.2                         | 21.7                             | 22.7                         |
| Non-smoker                                             | 76.8                         | 78.3                             | 77.3                         |
| <b>Any chronic diseases(e.g., asthma and diabetes)</b> |                              |                                  |                              |
| No                                                     | 91.9                         | 92.7                             | 84.6                         |
| Diabetes                                               | 3.0                          | 0.4                              | 1.6                          |
| Asthma                                                 | 2.0                          | 2.4                              | 2.3                          |
| Gastrointestinal (e.g., IBS, IBD, GERD, and ulcer)     | 1.5                          | 3.2                              | 2.5                          |
| Hypertension                                           | 1.5                          | 0                                | 0.7                          |
| Hyperlipidemia                                         | 0                            | 0.4                              | 0.2                          |
| Multiple sclerosis                                     | 0                            | 0.4                              | 0.2                          |
| Epilepsy                                               | 0                            | 0.4                              | 0.2                          |
| <b>Regular medical checkup(e.g., every year)</b>       |                              |                                  |                              |
| No                                                     | 68.2                         | 75.3                             | 72.2                         |
| Yes                                                    | 31.8                         | 24.7                             | 27.8                         |
| <b>Frequency of exercise</b>                           |                              |                                  |                              |
| 1–2 days per week                                      | 16.7                         | 30.5                             | 24.5                         |
| 3–5 days per week                                      | 58                           | 47.6                             | 52.2                         |
| 6–7 days per week                                      | 25.3                         | 21.9                             | 23.4                         |
| <b>Average time spent on exercise daily</b>            |                              |                                  |                              |
| Less than 1 hour                                       | 18.7                         | 34.6                             | 27.5                         |
| 1–2 hours                                              | 73.7                         | 54.3                             | 63                           |
| More than 2 hours                                      | 7.6                          | 11.1                             | 9.5                          |

Note: Data are expressed as frequencies and percentages. IBS: Irritable Bowel Syndrome, IBD: Irritable Bowel Disease, GERD: Gastroesophageal Reflux Disease

<https://doi.org/10.1371/journal.pone.0199289.t001>

**Table 2. Participants' beliefs regarding dietary supplements.**

| Beliefs regarding dietary supplements                                    | Supplement users<br>N = 198<br>(%) | Non-supplement users N = 247<br>(%) | P-value  |
|--------------------------------------------------------------------------|------------------------------------|-------------------------------------|----------|
| <b>Dietary supplements have side effects</b>                             |                                    |                                     |          |
| Yes                                                                      | 43.4                               | 52.2                                | <0.0001* |
| No                                                                       | 37.9                               | 13.4                                |          |
| Do not know                                                              | 18.7                               | 34.4                                |          |
| <b>Dietary supplements have positive effects on exercise performance</b> |                                    |                                     |          |
| Yes                                                                      | 81.8                               | 44.1                                | <0.0001* |
| No                                                                       | 5.6                                | 17.8                                |          |
| Do not know                                                              | 12.6                               | 38.1                                |          |
| <b>Dietary supplements make you healthier</b>                            |                                    |                                     |          |
| Yes                                                                      | 69.7                               | 22.7                                | <0.0001* |
| No                                                                       | 15.2                               | 32.4                                |          |
| Do not know                                                              | 15.2                               | 44.9                                |          |
| <b>Dietary supplements improve your stamina</b>                          |                                    |                                     |          |
| Yes                                                                      | 64.7                               | 31.2                                | <0.0001* |
| No                                                                       | 17.7                               | 18.6                                |          |
| Do not know                                                              | 17.7                               | 50.2                                |          |
| <b>Dietary supplements boost your energy</b>                             |                                    |                                     |          |
| Yes                                                                      | 71.2                               | 48.9                                | <0.0001* |
| No                                                                       | 17.7                               | 12.9                                |          |
| Do not know                                                              | 11.1                               | 38.1                                |          |
| <b>Dietary supplements help you cope with or overcome physical pain</b>  |                                    |                                     |          |
| Yes                                                                      | 42.9                               | 20.6                                | <0.0001* |
| No                                                                       | 32.8                               | 26.7                                |          |
| Do not know                                                              | 24.2                               | 52.6                                |          |
| <b>Dietary supplements improve your ability to concentrate</b>           |                                    |                                     |          |
| Yes                                                                      | 42.4                               | 21.5                                | <0.0001* |
| No                                                                       | 32.3                               | 26.3                                |          |
| Do not know                                                              | 25.3                               | 52.2                                |          |

\*Significant difference ( $P < 0.05$ )

<https://doi.org/10.1371/journal.pone.0199289.t002>

results between the two groups. Conversely, most of them reported not having an annual medical checkup; however, a higher percentage of supplement users reported having an annual medical checkup (31.8% vs. 24.7%), exercising at least three times per week (83.3% vs. 69.4%), and spending at least an hour on exercise per day (81.3% vs. 65.4%) compared to non-supplement users.

The participants' beliefs regarding dietary supplements are shown in Table 2. Significantly more non-users than supplement users believed that dietary supplements have side effects (52.2% vs. 43.4%;  $P < 0.0001$ ). By contrast, more supplement users than non-users believed that dietary supplements have positive effects on exercise performance (81.4% vs. 44.1%;  $P < 0.0001$ ), make them healthier (69.7% vs. 22.7%;  $P < 0.0001$ ), improve their stamina (64.7% vs. 31.2%;  $P < 0.0001$ ), boost their energy (71.2% vs. 48.9%;  $P < 0.0001$ ), help them cope with or overcome physical pain (42.9% vs. 20.6%;  $P < 0.0001$ ), and improve their ability to concentrate (42.4% vs. 21.5%;  $P < 0.0001$ ).

Fig 1 shows the different dietary supplements that were used by 44.5% of the participants. The five most commonly consumed supplements were protein (61.6%), multivitamins

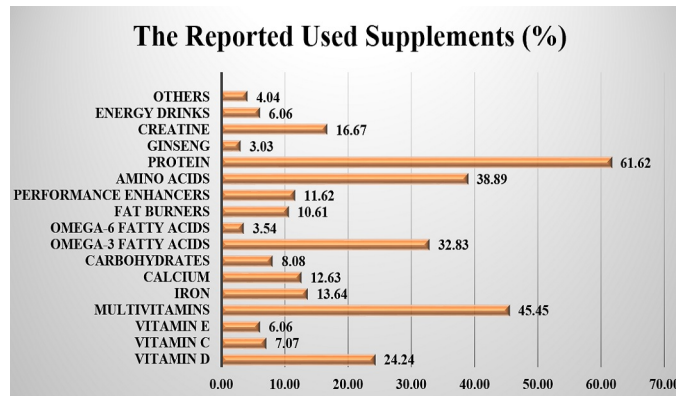

Fig 1. Dietary supplements used by the participants.

<https://doi.org/10.1371/journal.pone.0199289.g001>

(45.5%), amino acids (38.9%), omega-3 fatty acids (32.8%), and vitamin D (24.2%). About 4.0% of the participants reported using dietary supplements, but did not recall their names; approximately 11.6% of them reported using dietary supplements with performance-enhancing claims, but did not mention their names. Out of the 198 dietary supplement users, 29.3% obtained the supplements from stores outside the country, 28.3% online, 25.8% from local dietary supplements stores, 25.3% from local pharmacies, 19.2% from local medical clinics, and 17.7% from unofficial sellers or peddlers (Fig 2).

## Discussion

The use of dietary supplements and performance enhancers is increasing among the Middle Eastern youth [1–4]. Almost half of the fitness center members who were included in this study reported using at least one dietary supplement. In addition to estimating the prevalence of the use of different dietary supplements among Saudi fitness center members, this study has compared positive and negative beliefs regarding dietary supplements between supplement users and non-users. Most of the participants who reported using dietary supplements had positive beliefs regarding dietary supplements. This is consistent with the findings of a previous study that explored Saudi athletes’ opinions on dietary supplements and the prevalence of their use among them [4]. Moreover, the proportion of participants with favorable views on dietary supplements was significantly higher among participants who reported using these

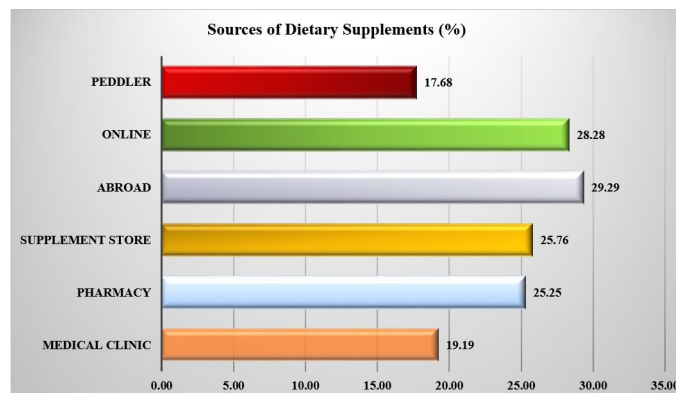

Fig 2. Sources of dietary supplements.

<https://doi.org/10.1371/journal.pone.0199289.g002>

supplements compared to non-supplement users. Furthermore, the proportion of participants who believed that dietary supplements have side effects was significantly lower among users of dietary supplements compared to non-supplement users. These comparisons were not reported or discussed among Saudi or Middle Eastern youth in previous studies.

Proteins, amino acids, multivitamins, vitamin D, and omega-3 fatty acids were the most commonly reported dietary supplements used among the participants, which is to a great extent similar to the findings of previously published studies [1–4]. Moreover, approximately 12% of the participants who reported using dietary supplements reported taking performance enhancers without providing any details of their names. These performance enhancers may contain illicit or prescription drugs, such as amphetamines, which can lead to serious consequences [18, 19]. Approximately 18% of the dietary supplement users reported buying their dietary supplements from unlicensed sellers or peddlers, which might be contaminated with microorganisms or contain unknown ingredients [7, 9, 10, 15]. Therefore, the SFDA and Ministry of Health should intensify their efforts to prevent the entry and sale of unlicensed dietary supplements.

### Limitations

Although this study was conducted in four fitness centers and was sufficiently powered, it was only conducted in one city. Therefore, the findings of this study cannot be applied to the general Saudi population. Further, recall bias is another issue, since some participants did not remember the name or the active ingredients of the dietary supplements they reported using on a regular basis. In addition, some important variables that might be associated with the use of dietary supplements among fitness center members, such as health literacy and income of the participants, were not collected.

### Conclusions

The results of this study should encourage public health researchers and health advocates to design and implement behavioral interventions through media campaigns and other means to educate the public on the benefits and risks of dietary supplements, especially of those used by athletes to enhance their performance. Those campaigns should also raise public's awareness on the unexpected ingredients that have been found in dietary supplements purchased from unauthorized sellers. Further, the SFDA should work closely with the Ministry of Health to improve their oversight on the entry of unlicensed dietary supplements into the country and their inspection of pharmacies, medical clinics, and fitness centers that sell dietary supplements without having a license to sell such products.

### Supporting information

#### S1 De-identified Data.

(XLSX)

#### S1 Questionnaire Form.

(DOCX)

### Author Contributions

**Conceptualization:** Yazed AlRuthia, Marwan Alrasheed, Ahmed Altuwaijri, Mohammad Alarifi.

**Data curation:** Yazed AlRuthia.



**Formal analysis:** Yazed AlRuthia, Bander Balkhi, Huda Alzahrani.

**Methodology:** Marwan Alrasheed, Mohammad Alarifi.

**Project administration:** Marwan Alrasheed, Ahmed Altuwaijri, Wael Mansy.

**Writing – original draft:** Yazed AlRuthia, Wael Mansy.

**Writing – review & editing:** Yazed AlRuthia, Huda Alzahrani, Wael Mansy.

## References

1. Lindstrom A, Ooyen C, Ellen Lynch M, Blumenthal M, Kawa K. Sales of herbal dietary supplements increase by 7.9% in 2013, marking a decade of rising sales: turmeric supplements climb to top ranking in natural channel. *HerbalGram*. 2014; 103: 52–56.
2. Bailey RL, Gahche JJ, Miller PE, Thomas PR, Dwyer JT. Why US adults use dietary supplements. *JAMA Intern Med*. 2013; 173: 355–361. <https://doi.org/10.1001/jamainternmed.2013.2299> PMID: 23381623
3. Alhomoud FK, Basil M, Bondarev A. Knowledge, attitudes and practices (KAP) relating to dietary supplements among health sciences and non-health sciences students in one of the universities of United Arab Emirates (UAE). *J Clin Diagn Res*. 2016; 10: Jc05–Jc09.
4. Tawfik S, El Koofy N, Moawad EM. Patterns of nutrition and dietary supplements use in young Egyptian athletes: a community-based cross-sectional survey. *PLoS One*. 2016; 11: e0161252. <https://doi.org/10.1371/journal.pone.0161252> PMID: 27529492
5. Waly MI, Kilani HA, Al-Busafi MS. Nutritional practices of athletes in Oman: a descriptive study. *Oman Med J*. 2013; 28: 360–364. <https://doi.org/10.5001/omj.2013.103> PMID: 24044066
6. Aljaloud SO, Ibrahim SA. Use of dietary supplements among professional athletes in Saudi Arabia. *J Nutr Metab*. 2013; 7.
7. Dietary Supplement Health and Education Act (DSHEA) of 1994. Public Law. 103–417.
8. Marcus DM. Dietary supplements: What's in a name? What's in the bottle? *Drug Test Anal*. 2016; 8:410–412. <https://doi.org/10.1002/dta.1855> PMID: 27072845
9. Owens DJ, Tang JC, Bradley WJ, Sparks AS, Fraser WD, Morton JP, et al. Efficacy of high dose vitamin D supplements for elite athletes. *Med Sci Sports Exerc*. 2017; 49:349–356. <https://doi.org/10.1249/MSS.0000000000001105> PMID: 27741217
10. Zoller H, Vogel W. Iron supplementation in athletes—first do no harm. *Nutrition*. 2004; 20: 615–619. <https://doi.org/10.1016/j.nut.2004.04.006> PMID: 15212743
11. SFDA. The Saudi Food and Drug Authority guide for registering new health preparations and supplements. 2014; 9–25.
12. Pawar RS, Grundel E. Overview of regulation of dietary supplements in the USA and issues of adulteration with phenethylamines (PEAs). *Drug Test Anal*. 2017; 9:500–517. <https://doi.org/10.1002/dta.1980> PMID: 27259162
13. Deldicque L, Francaux M. Potential harmful effects of dietary supplements in sports medicine. *Curr Opin Clin Nutr Metab Care*. 2016; 19: 439–445. <https://doi.org/10.1097/MCO.0000000000000321> PMID: 27552474
14. Cohen PA, Maller G, DeSouza R, Neal-Kababick J. Presence of banned drugs in dietary supplements following FDA recalls. *JAMA*. 2014; 312: 1691–1693. <https://doi.org/10.1001/jama.2014.10308> PMID: 25335153
15. Aljaloud SO. Microbiological quality and safety of energy drink available in the local markets in Saudi Arabia. *Int J Food Sci Nutr Diet*. 2016; 5: 287–289.
16. Pawar RS, Tamta H, Ma J, Krynitsky AJ, Grundel E, Wamer WG, et al. Updates on chemical and biological research on botanical ingredients in dietary supplements. *Anal Bioanal Chem*. 2013; 405: 4373–4384. <https://doi.org/10.1007/s00216-012-6691-2> PMID: 23322353
17. Cohen PA. DMAA as a dietary ingredient-reply. *JAMA Intern Med*. 2013; 173: 595.
18. Karnatovskaia LV, Leoni JC, Freeman ML. Cardiac arrest in a 21-year-old man after ingestion of 1,3-DMAA-containing workout supplement. *Clin J Sport Med*. 2015; 25: e23–e25. <https://doi.org/10.1097/JSM.000000000000103> PMID: 24878759
19. Archer JR, Dargan PI, Lostia AM, Van der Walt, Henderson K, Drake N. Running an unknown risk: a marathon death associated with the use of 1,3-dimethylamylamine (DMAA). *Drug Test Anal*. 2015; 7: 433–438. <https://doi.org/10.1002/dta.1764> PMID: 25641767



20. Carvajal R. Contaminated dietary supplements. *N Engl J Med.* 2010; 362: 274; author reply 274. <https://doi.org/10.1056/NEJMc0911467> PMID: 20089984
21. Cohen PA, Venhuis BJ. Adulterated sexual enhancement supplements: more than mojo. *JAMA Intern Med.* 2013; 173: 1169–1170. <https://doi.org/10.1001/jamainternmed.2013.854> PMID: 23699734
22. Faul F EE, Buchner A, Lang A-G. Statistical power analyses using G\* Power 3.1: Tests for correlation and regression analyses. *Behav Res Methods.* 2009; 41: 1149–1160. <https://doi.org/10.3758/BRM.41.4.1149> PMID: 19897823
23. Morrison LJ, Gizis F, Shorter B. Prevalent use of dietary supplements among people who exercise at a commercial gym. *Int J Sport Nutr Exerc Metab.* 2004; 14: 481–492. PMID: 15467105
24. Eliason BC, Kruger J, Mark D, Rasmann DN. Dietary supplement users: demographics, product use, and medical system interaction. *J Am Board Fam Pract.* 1997; 10: 265–271. PMID: 9228621
